# Supplementary material for: Human Enzyme PADI4 Binds to the Nuclear Carrier Importin α3
Source: MDPI journal article supplement (doi:10.3390/cells11142166), 2022-07-11
Supplement: s1 [file s1]

## Supplementary Material

### Human enzyme PADI4 binds to the nuclear carrier Importin $\alpha 3$

José L Neira, Bruno Rizzuti, Olga Abian, Salomé Araujo-Abad, Adrian Velazquez-Campoy and Camino

de Juan Romero

**FIGURE S1. Binding to PADI4 of  $\Delta$ Imp $\alpha 3$  monitored by fluorescence.** (A) Fluorescence spectrum obtained by excitation at 280 nm of the PADI4/ $\Delta$ Imp $\alpha 3$  complex, and addition spectrum obtained by the sum of the spectra of the two isolated macromolecules. (B) Titration curve monitoring the relative changes of fluorescence at 330 nm when  $\Delta$ Imp $\alpha 3$  was added to PADI4. The fluorescence intensity on the y-axis is the relative fluorescence intensity after removal of the corresponding blank. The line through the data is the fitting to Eq. (1). Experiments were carried out at 25 °C.

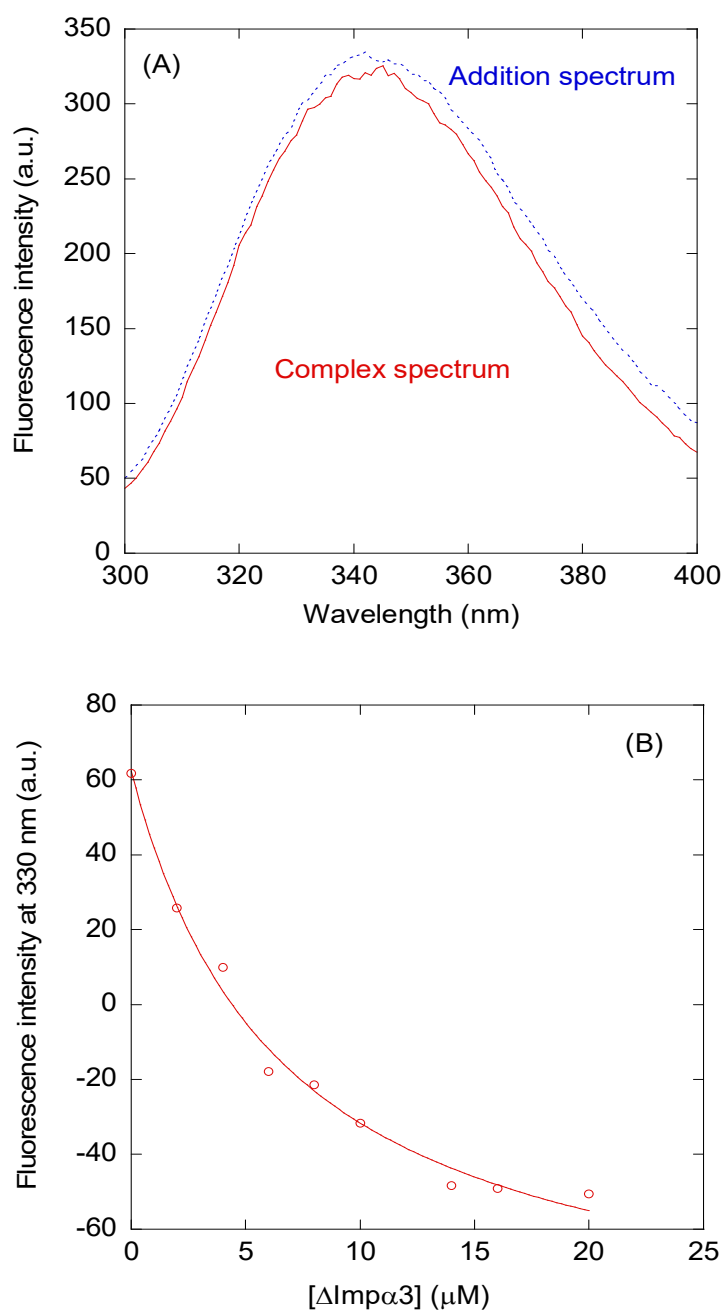

FIGURE S2. SEC of NLS1/2-PADI4 peptides: Chromatograms of both peptides in Tris 20 mM, pH 7.6 and 250 mM NaCl. The units of absorbance (at 280 nm) are arbitrary.

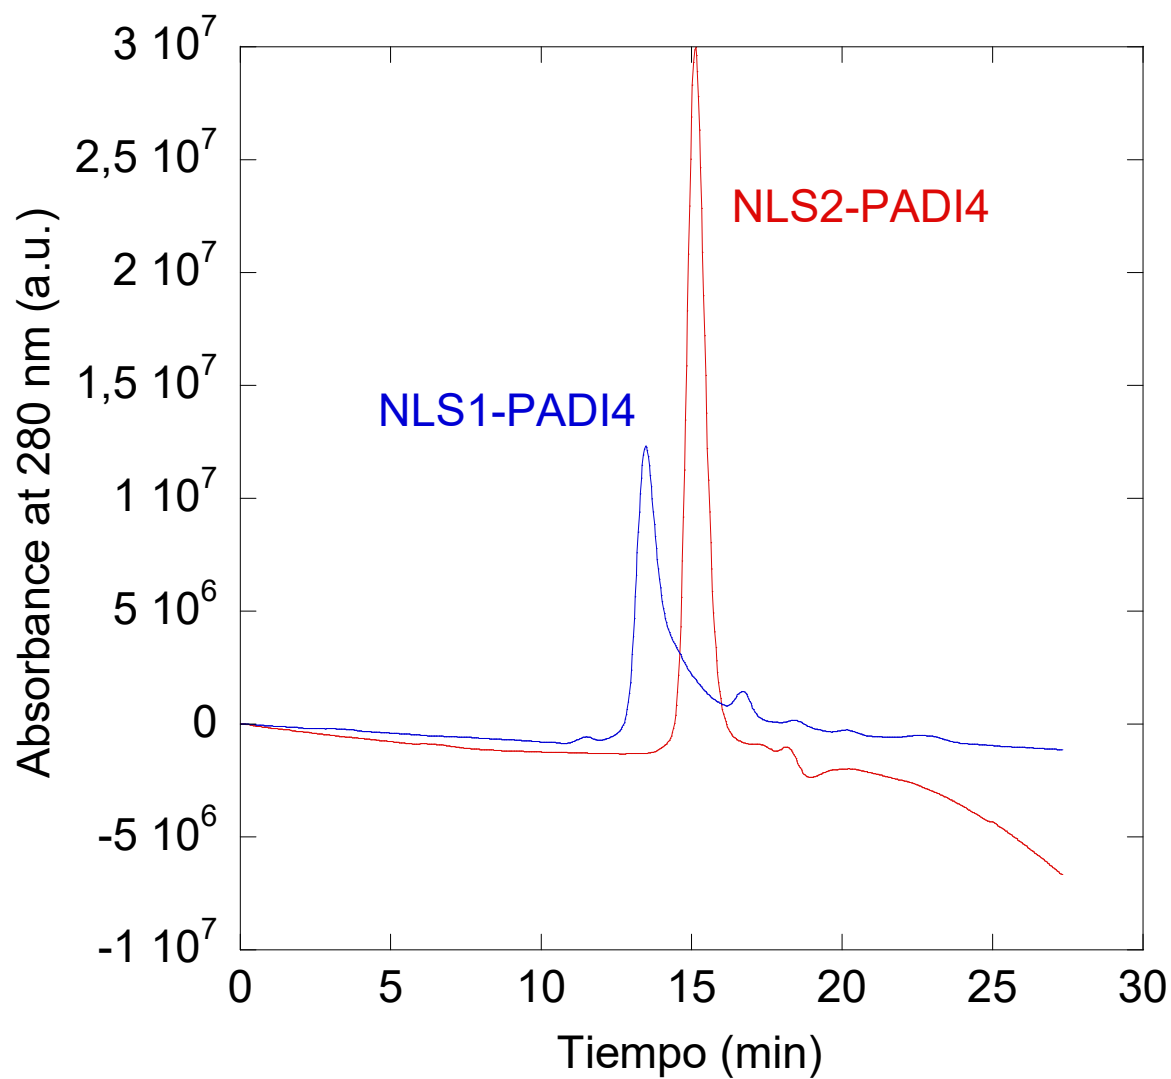

**FIGURE S3. Binding of importin species to NSL1-PAD14 as monitored by spectroscopic probes:** (A) Fluorescence spectrum of the complex Imp $\alpha$ 3/NSL1-PAD14 and that obtained by the addition of the spectra of the two isolated molecules. (B) Far-UV CD spectrum of the complex  $\Delta$ Imp $\alpha$ 3/NSL1-PAD14 and that obtained by the addition of the spectra of the two isolated molecules. Experiments were carried out at 25 °C.

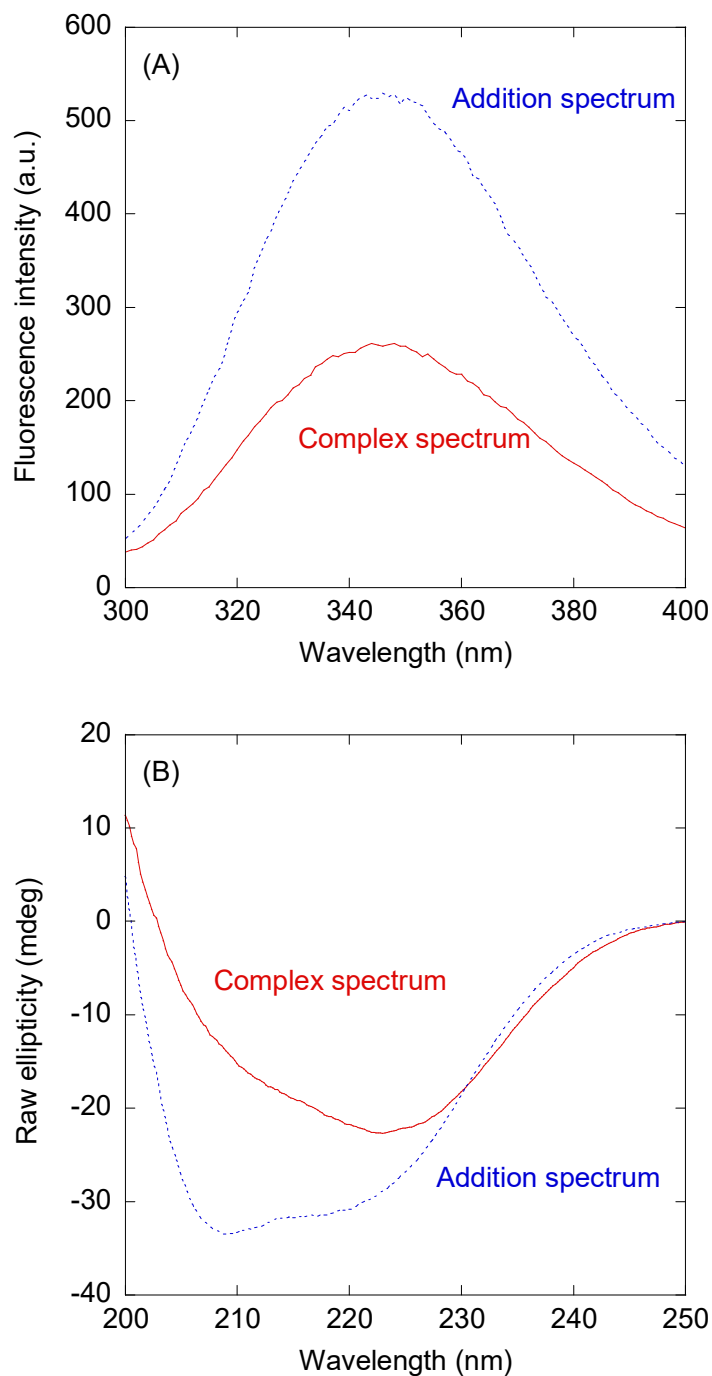

FIGURE S4. **Sensorgrams of NSL1-PADI4 monitored by BLI**: The curves correspond to the pseudo-first order plots shown in Fig. 7 for (A) Imp $\alpha$ 3 and (B)  $\Delta$ Imp $\alpha$ 3. Experiments were carried out at 25 °C.

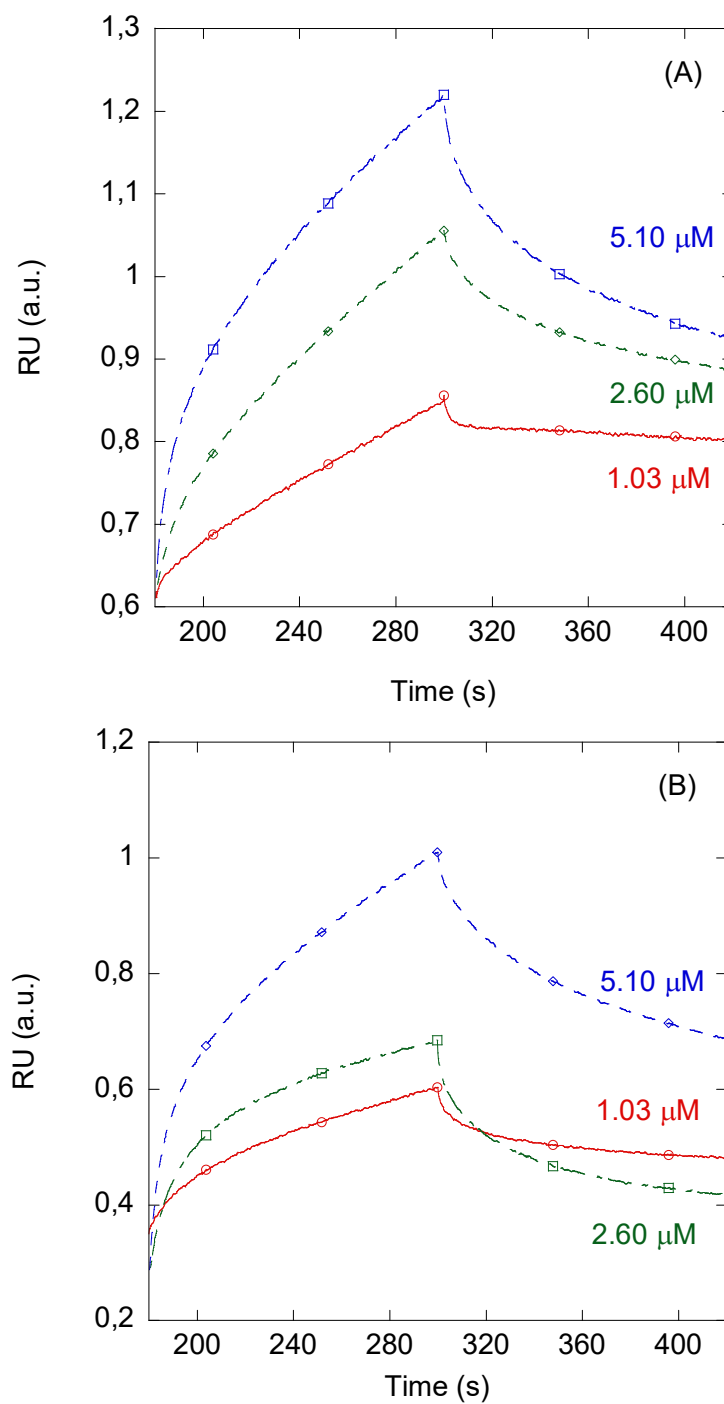

**FIGURE S5. Comparison of the affinity of the two NLS regions of PADI4 as estimated in molecular docking simulations performed by using different templates for Imp $\alpha$ 3.** The curves (black) obtained for the structure extracted from the PDB entry 5XZX ([65], in the main text), which reports the crystallographic complex of Imp $\alpha$ 3 with the NLS of the Ran-binding protein 3 (see also Fig. 10 in the manuscript) are compared with the curves (red) obtained for Imp $\alpha$ 3 structure built by using as a model the PDB entry 5X8N ([66], in the main text), which reports the crystallographic complex of Imp $\alpha$ 1 with the NLS of the Epstein-Barr virus EBNA-LP protein. (A) peptide NLS1-PADI4, encompassing residues 58-84; (B) NLS2 region of PADI4, including the N-terminal residues 490-497 and the peptide NLS2-PADI4 encompassing residues 498-526. The affinity is calculated for 7-residue-long fragments, and values reported for each residue are the average over all simulation runs including that residue.

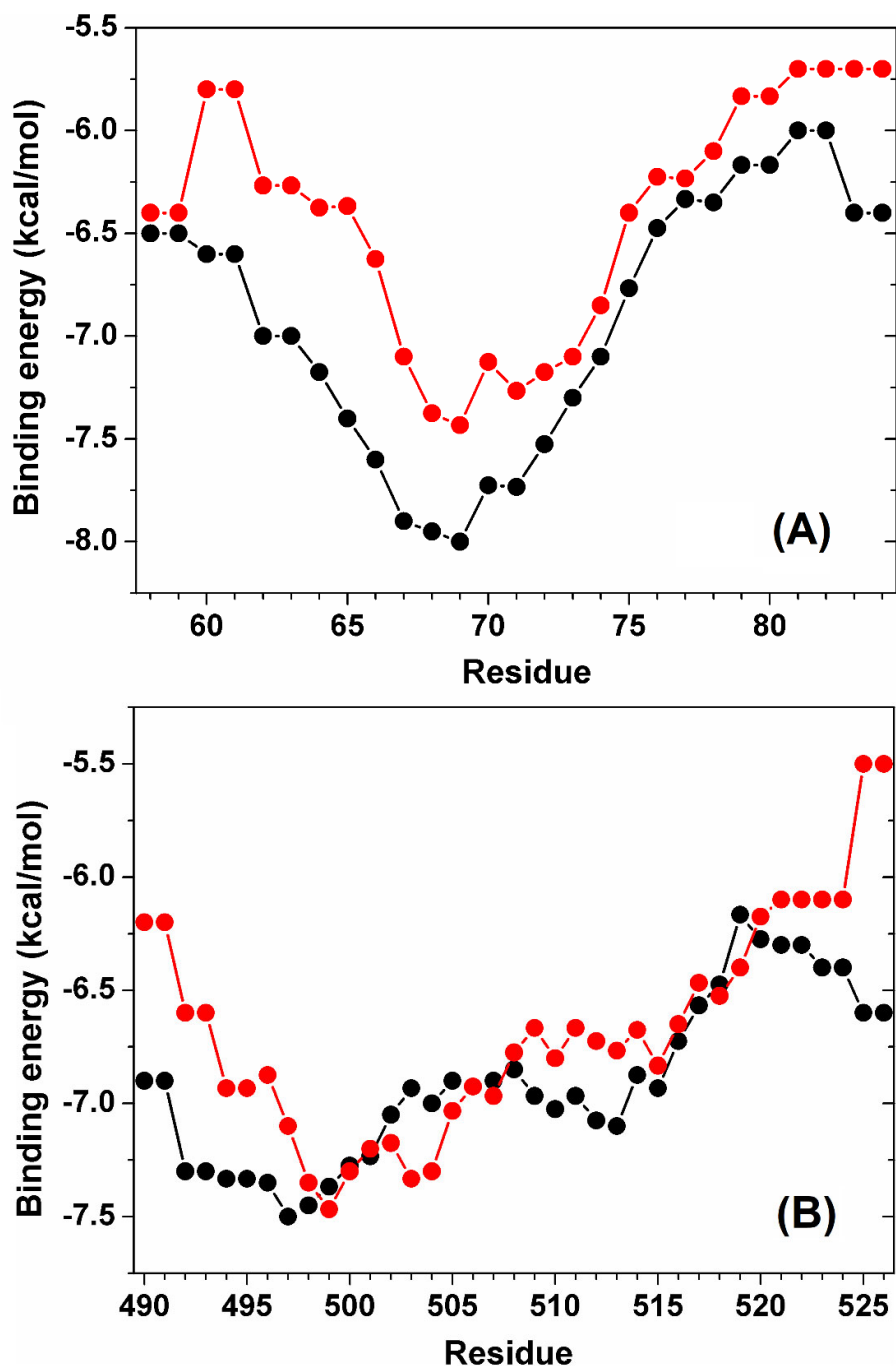

**FIGURE S6. Binding location of 7-residue-long fragments of the two NLS regions of PADI4 on the surface of Imp $\alpha$ 3 observed in simulations.** Results are shown for Imp $\alpha$ 3 structure built by using as a model the PDB entry 5X8N ([66] in the main text), which reports the crystallographic complex of Imp $\alpha$ 1 with the NLS of the Epstein-Barr virus EBNA-LP protein. (Left) conformations of peptide NLS1, and (right) peptide NLS2. Fragments follow the color scheme red  $\rightarrow$  magenta  $\rightarrow$  blue, going from the N to the C terminus of the two NLS peptides. (Center) comparison among the fragments with the most favourable binding affinity of (magenta) NLS1-PADI4 and (red) NLS2-PADI4, and (cyan) crystallographic pose of the NLS of the Epstein-Barr virus EBNA-LP protein. For clarity, the sole backbone chain is shown for all the sequences.

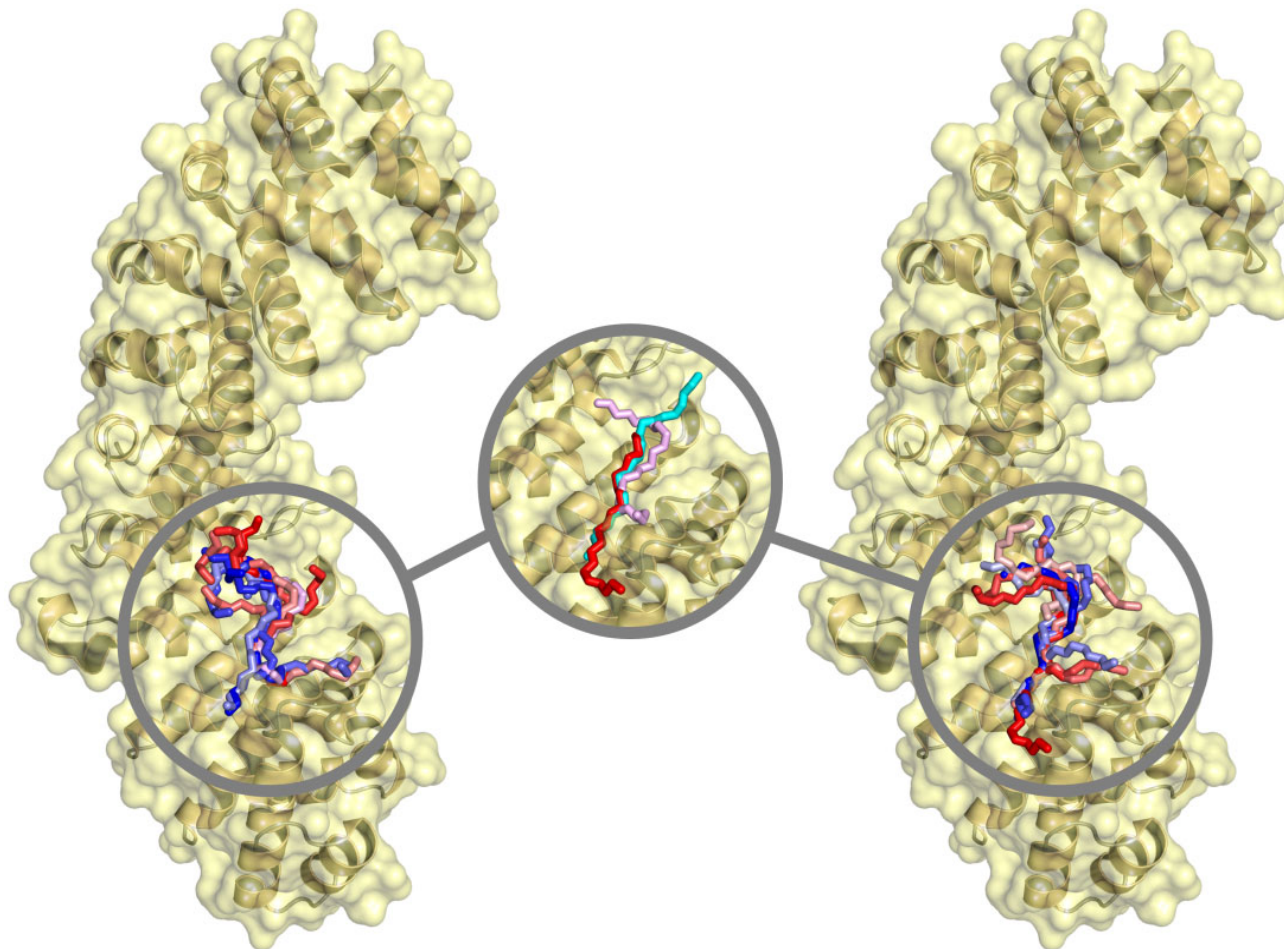

**FIGURE S7: Location of the two NLSs in the folded structure of PADI4:** The homodimer (shown either in van der Waals or ribbon representation) of PADI4 possesses in each monomer the two solvent-exposed NLS region 56-83 (blue) and 495-526 (red).

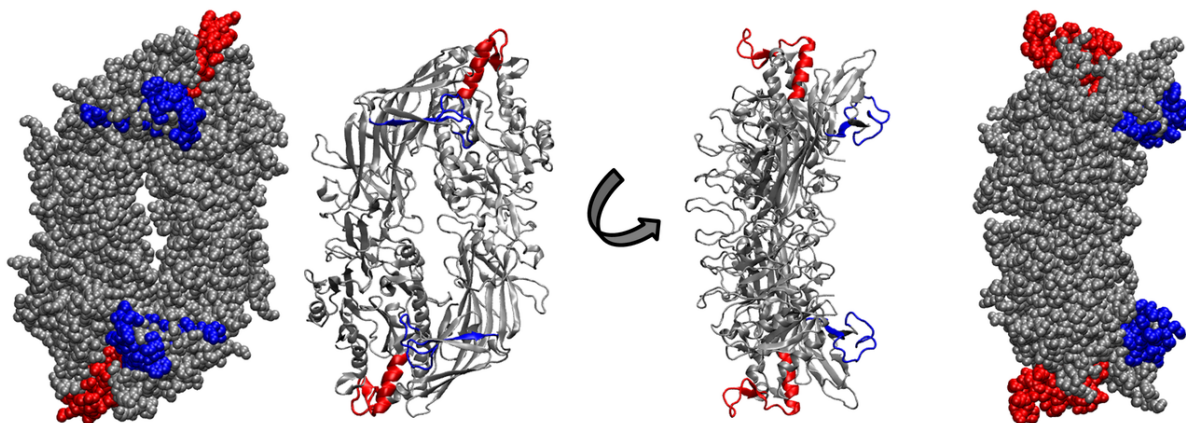

# SUPPPORTING TABLE

Table S1. Chemical shifts ( $\delta$ , ppm from TSP) of NLS2-PADI4 in aqueous solution (pH 7.0, 10 °C)<sup>a</sup>

|           | NH   | H $_{\alpha}$ | H $_{\beta 2}$ | H $_{\beta 3}$ | H $_{\gamma 2}$ | H $_{\gamma 3}$ | H $_{\delta 2}$ | H $_{\delta 3}$ | H $_{\epsilon}$ | H $_{\zeta}$ |
|-----------|------|---------------|----------------|----------------|-----------------|-----------------|-----------------|-----------------|-----------------|--------------|
| Ac-Tyr498 | 8.29 | 4.48 (-0.09)  | 2.96           |                |                 |                 | 7.10            |                 | 6.82            |              |
| Lys499    | 8.26 | 4.23 (0.03)   | 1.65           |                | 1.24            |                 |                 |                 |                 |              |
| Leu500    | 8.10 | 4.27 (0.05)   | 1.46           |                |                 |                 | 0.87 (Me)       |                 |                 |              |
| Phe501    | 8.28 | 4.55 (-0.11)  | 3.03           |                |                 |                 | 7.23            |                 | 7.34            |              |
| Gln502*   | 8.53 | 4.25 (-0.05)  | 1.99           |                | 2.33            |                 |                 |                 |                 |              |
| Glu503*   | 8.50 | 4.23 (0.03)   | 2.00           |                | 2.30            |                 |                 |                 |                 |              |
| Gln504*   | 8.48 | 4.18 (-0.14)  | 1.95           |                | 2.28            |                 |                 |                 |                 |              |
| Gln505*   | 8.48 | 4.18 (-0.16)  | 1.95           |                | 2.28            |                 |                 |                 |                 |              |
| Asn506    | 8.56 | 4.69 (-0.01)  | 2.75           |                |                 |                 |                 |                 |                 |              |
| Glu507    | 8.49 | 4.23 (-0.04)  | 1.95           |                | 2.30            |                 |                 |                 |                 |              |
| Gly508    | 8.53 | 3.96 (0.01)   |                |                |                 |                 |                 |                 |                 |              |
| His509    | 8.52 | 4.76 (0.07)   | 3.17; 3.34     |                |                 |                 |                 |                 |                 |              |
| Gly510    | 8.64 | 3.95 (-0.04)  |                |                |                 |                 |                 |                 |                 |              |
| Glu511    | 8.60 | 4.25 (0.01)   | 1.93; 2.07     |                | 2.28            |                 |                 |                 |                 |              |
| Ala512    | 8.43 | 4.22 (-0.07)  | 1.38 (Me)      |                |                 |                 |                 |                 |                 |              |
| Leu513    | 8.21 | 4.24 (-0.02)  | 1.59           |                |                 |                 | 0.89 (Me)       |                 |                 |              |

|           |      |              |      |            |           |      |
|-----------|------|--------------|------|------------|-----------|------|
| Leu514    | 8.34 | 4.19 (-0.11) | 1.78 | 1.45       | 0.87 (Me) |      |
| Phe515    | 8.26 | 4.59 (-0.09) | 3.03 |            | 7.24      | 7.34 |
| Glu516*   | 8.53 | 4.25 (-0.01) | 1.99 | 2.33       |           |      |
| Gly517    | 8.02 | 3.90 (-0.04) |      |            |           |      |
| Ile518    | 8.02 | 4.09 (-0.04) | 1.90 | 1.18; 1.50 | 0.89 (Me) |      |
| Lys519*   | 8.44 | 4.22 (-0.09) | 1.78 |            |           |      |
| Lys520*   | 8.51 | 4.29 (0.02)  | 1.76 | 1.39       |           |      |
| Lys521*   | 8.51 | 4.29 (0.01)  | 1.76 | 1.39       |           |      |
| Lys522*   | 8.51 | 4.29 (0.01)  | 1.76 | 1.39       |           |      |
| Gln523*   | 8.43 | 4.25 (-0.01) | 1.95 | 2.28       |           |      |
| Gln524*   | 8.48 | 4.18 (-0.12) | 1.95 | 2.28       |           |      |
| Lys525*   | 8.51 | 4.29 (-0.03) | 1.76 | 1.39       |           |      |
| Ile526-Am | 8.35 | 4.08 (-0.06) | 1.78 | 1.45       | 0.91 (Me) |      |

<sup>a</sup> The (\*) indicates those residues whose resonances could not be unambiguously assigned. The N terminus was acetylated and the C terminus was amidated. For the H<sub>α</sub> proton column, the values within parenthesis are the conformational shifts ( $\delta_{\text{res}} - \delta_{\text{rc}}$ ). The random-coil values for the sequence were obtained from: [https://spin.niddk.nih.gov/bax/nmrserver/Poulsen\\_rc\\_CS/](https://spin.niddk.nih.gov/bax/nmrserver/Poulsen_rc_CS/).
